# Supplementary material for: STING regulates metabolic reprogramming in macrophages via HIF-1α during Brucella infection
Source: PubMed Central journal article supplement (PMC8153530; doi:10.1371/journal.ppat.1009597), 2021-05-14
Supplement: ppat.1009597.s003.pdf [file ppat.1009597.s003.pdf]

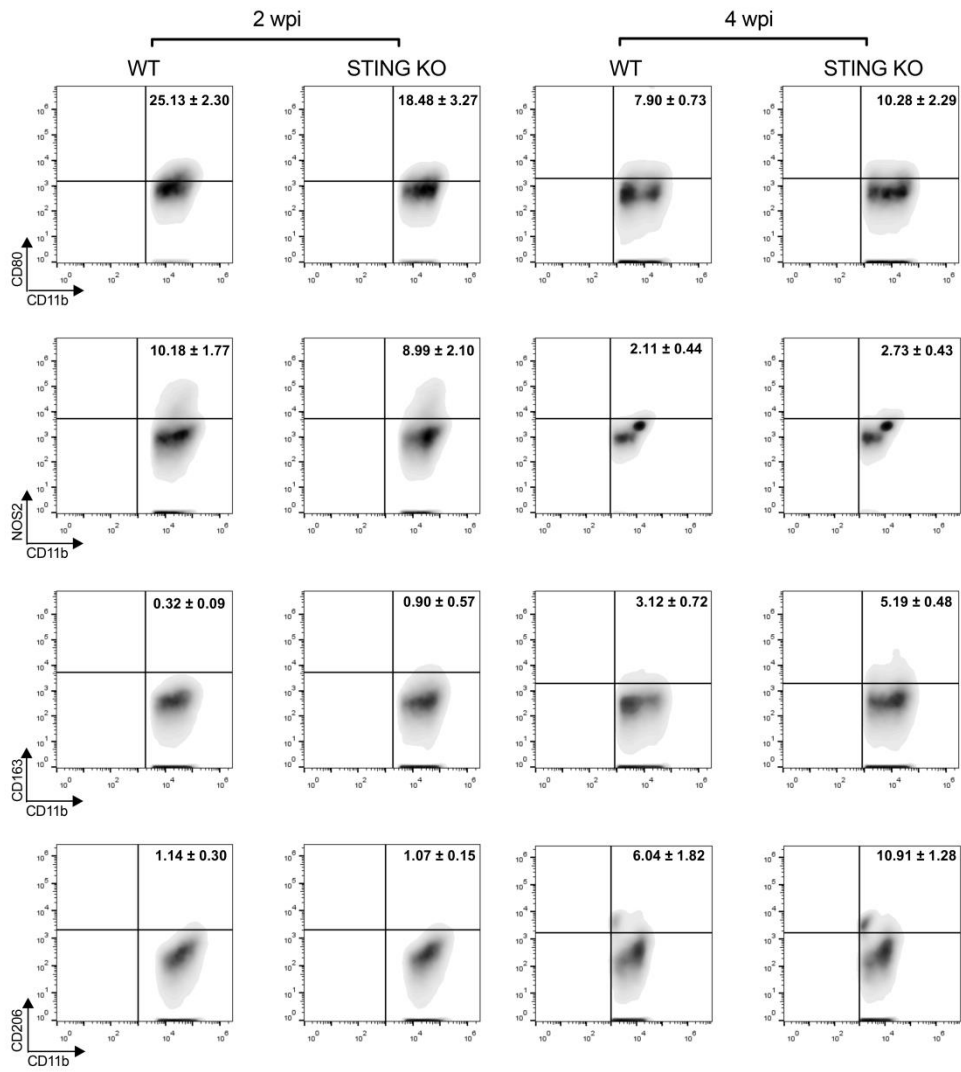

S3 Fig. Representative 2D-plots for WT and STING spleen cells from infected mice.
