# Supplementary material for: STING regulates metabolic reprogramming in macrophages via HIF-1α during Brucella infection
Source: PubMed Central journal article supplement (PMC8153530; doi:10.1371/journal.ppat.1009597), 2021-05-14
Supplement: ppat.1009597.s005.pdf [file ppat.1009597.s005.pdf]

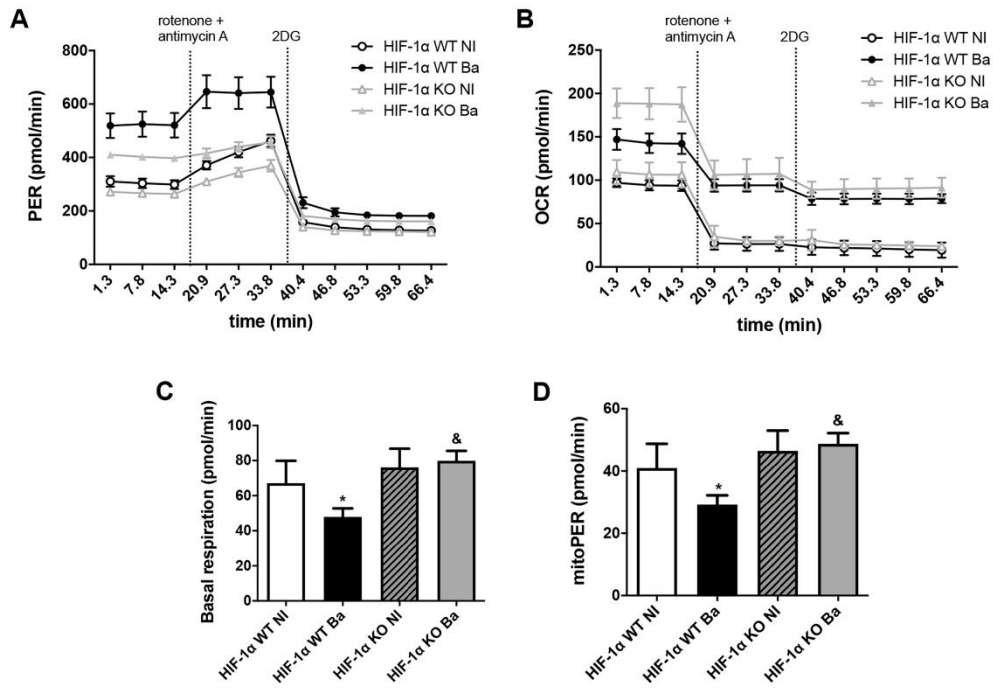

S5 Fig. Metabolic reprogramming in infected macrophages requires HIF-1 $\alpha$ .
