# Supplementary material for: STING regulates metabolic reprogramming in macrophages via HIF-1α during Brucella infection
Source: PubMed Central journal article supplement (PMC8153530; doi:10.1371/journal.ppat.1009597), 2021-05-14
Supplement: ppat.1009597.s006.pdf [file ppat.1009597.s006.pdf]

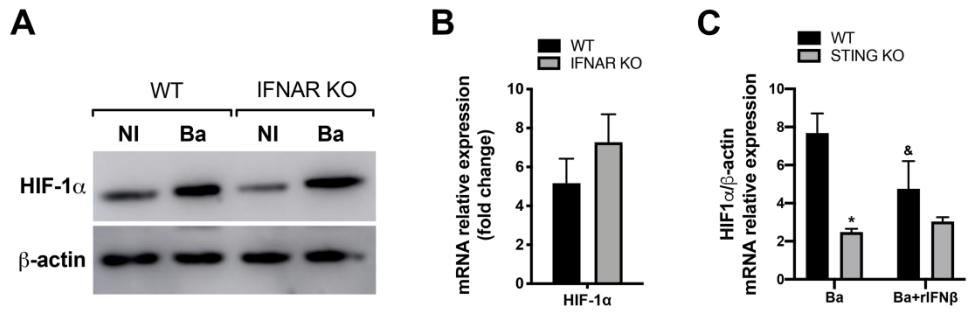

S6 Fig. Type I IFN response is not involved in HIF-1 $\alpha$  stabilization.
