# Supplementary material for: STING regulates metabolic reprogramming in macrophages via HIF-1α during Brucella infection
Source: PubMed Central journal article supplement (PMC8153530; doi:10.1371/journal.ppat.1009597), 2021-05-14
Supplement: ppat.1009597.s007.pdf [file ppat.1009597.s007.pdf]

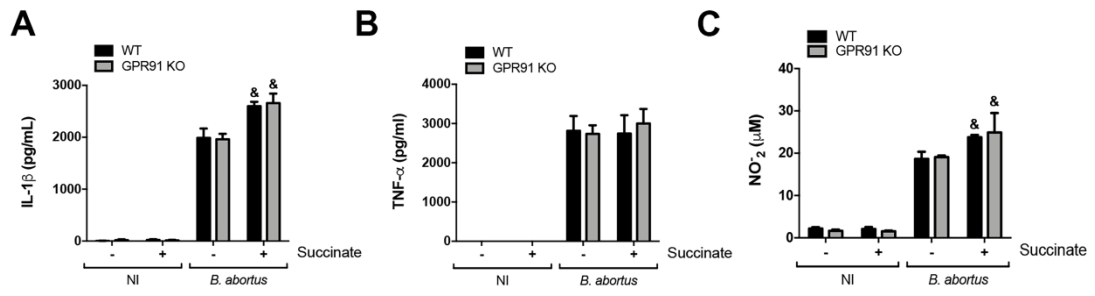

S7 Fig. Succinate drives IL-1 $\beta$  and NO production independently of GPR91.
